# Supplementary material
Source: PubMed Central journal article supplement (PMC6785242)
Supplement: NIHMS1532179-supplement-3.pdf [file NIHMS1532179-supplement-3.pdf]

Figure S1

**A**

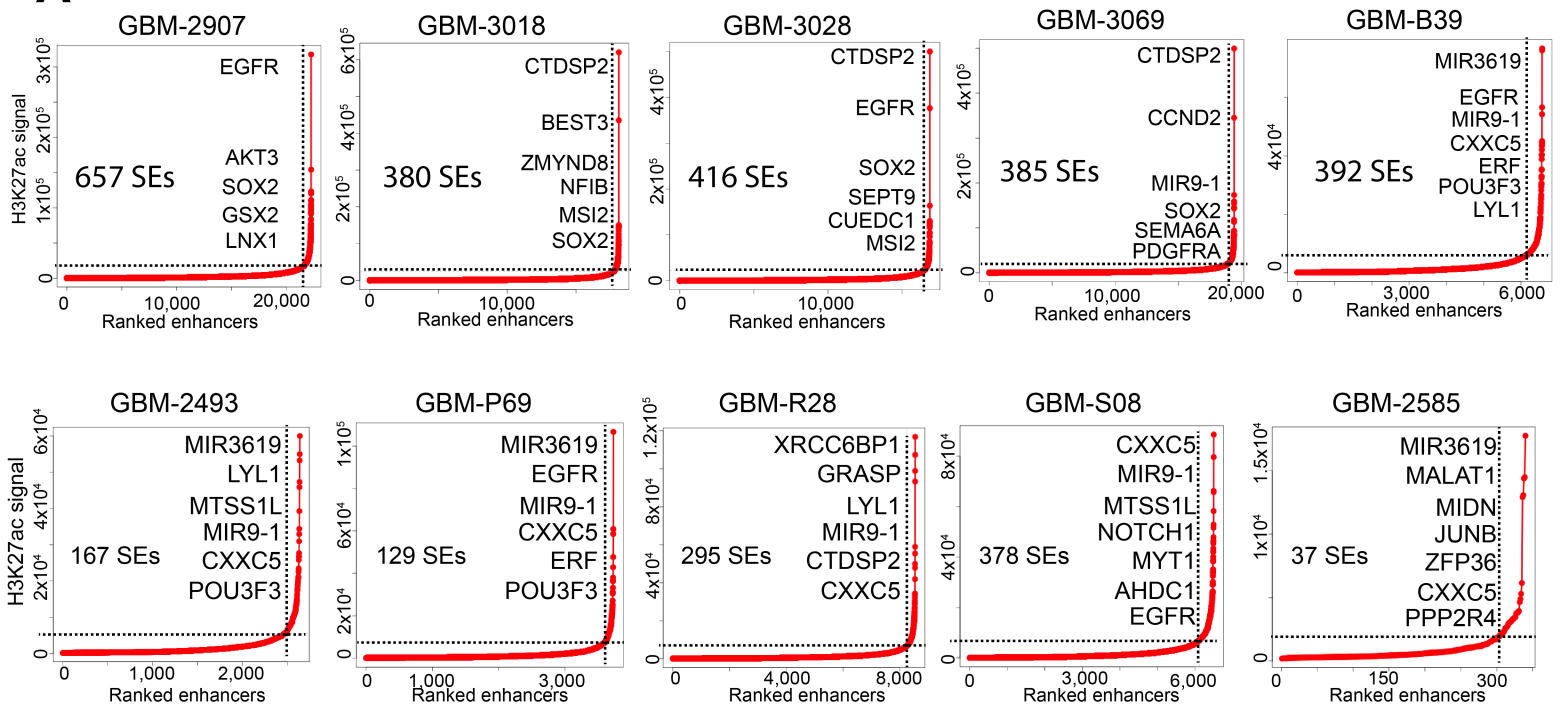

**B**

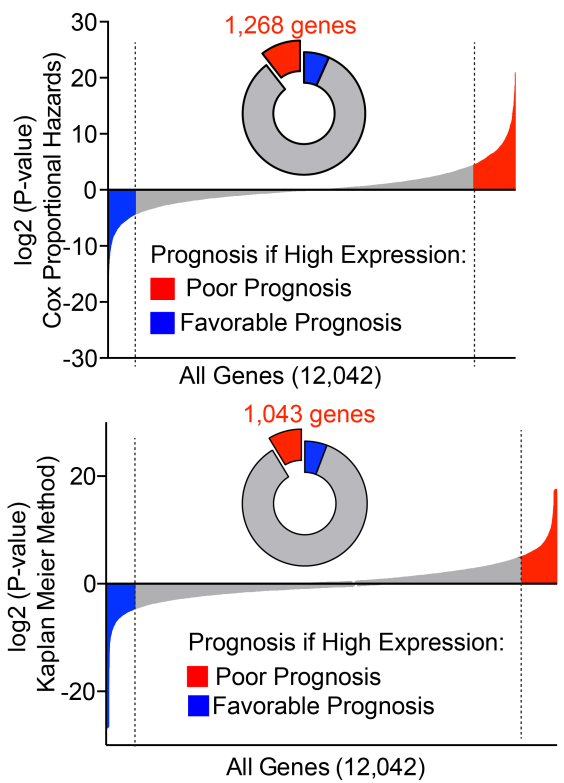

**C**

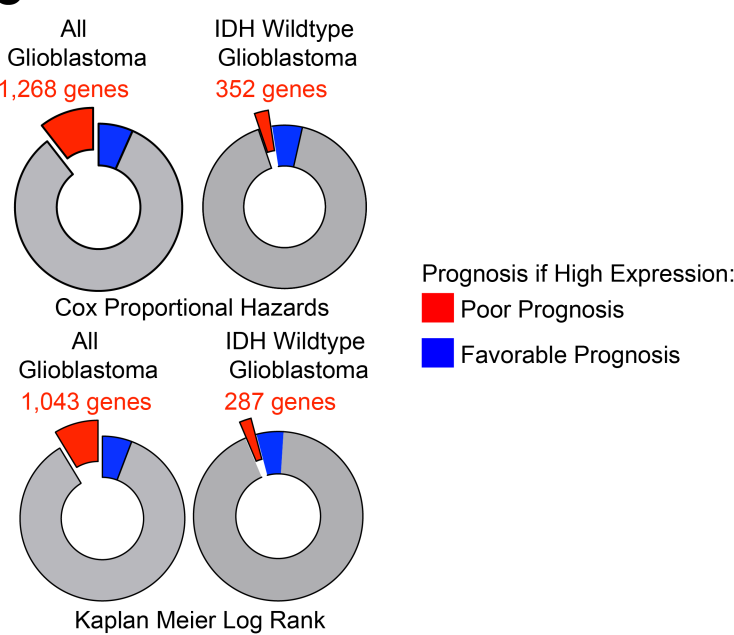

**D**

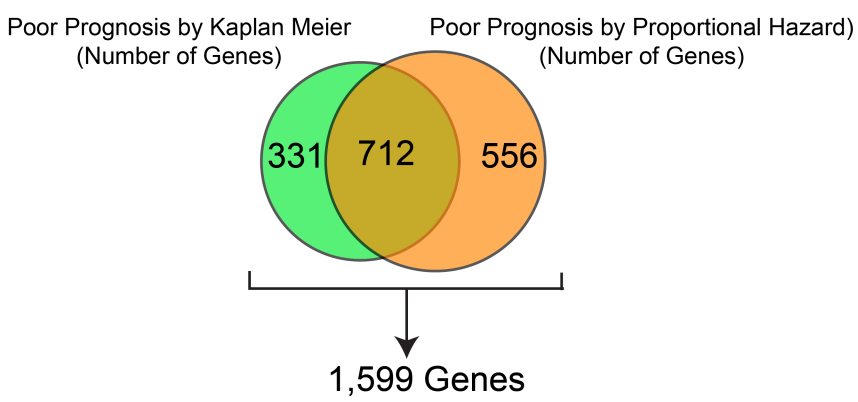

**E**

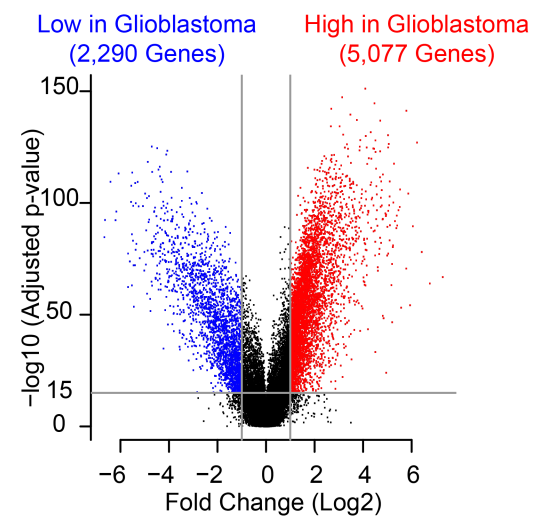

**Figure S1. In silico super-enhancer screen identifies potential glioblastoma stem cell specific therapeutic targets, related to Figure 1.**

- (A)** Super-enhancer hockey-stick plots show all ranked enhancers called from 10 glioblastoma primary tissue samples (GBM-2907, GBM-3018, GBM-3028, GBM-3069, GBM-B39, GBM-2493, GBM-P69, GBM-R28, GBM-S08, GBM-2585). Enhancers were ranked based on the difference between the H3K27ac signal from ChIP-seq data and the respective matched ChIP input file. Super-enhancers were defined by the ROSE algorithm.
- (B)** All genes present in the glioblastoma TCGA HG-U133A microarray dataset were analyzed for prognostic significance based on mRNA expression levels using (top) the Cox proportional hazards test or (bottom) log rank analysis with patients with greater than the average (mean) expression in the “High expression” group and others in the “Low expression” group.
- (C)** All genes present in the glioblastoma TCGA HG-U133A microarray dataset were analyzed for prognostic significance based on mRNA expression levels using (top) the Cox proportional hazards test or (bottom) log rank analysis with patients with greater than the average (mean) expression in the “High expression” group and others in the “Low expression” group. Survival analysis was performed across all glioblastoma patients (left) or restricted to IDH wildtype glioblastoma patients (right).
- (D)** Venn diagram illustrating overlaps between genes with poor prognosis as determined in (B).
- (E)** Volcano plot showing differentially expressed genes between glioblastoma TCGA RNA-seq data and the GTEx normal brain RNA-seq dataset, as derived from (54). Log<sub>2</sub> Fold change > 1, FDR-corrected p-value < 1e-15.

**Figure S2**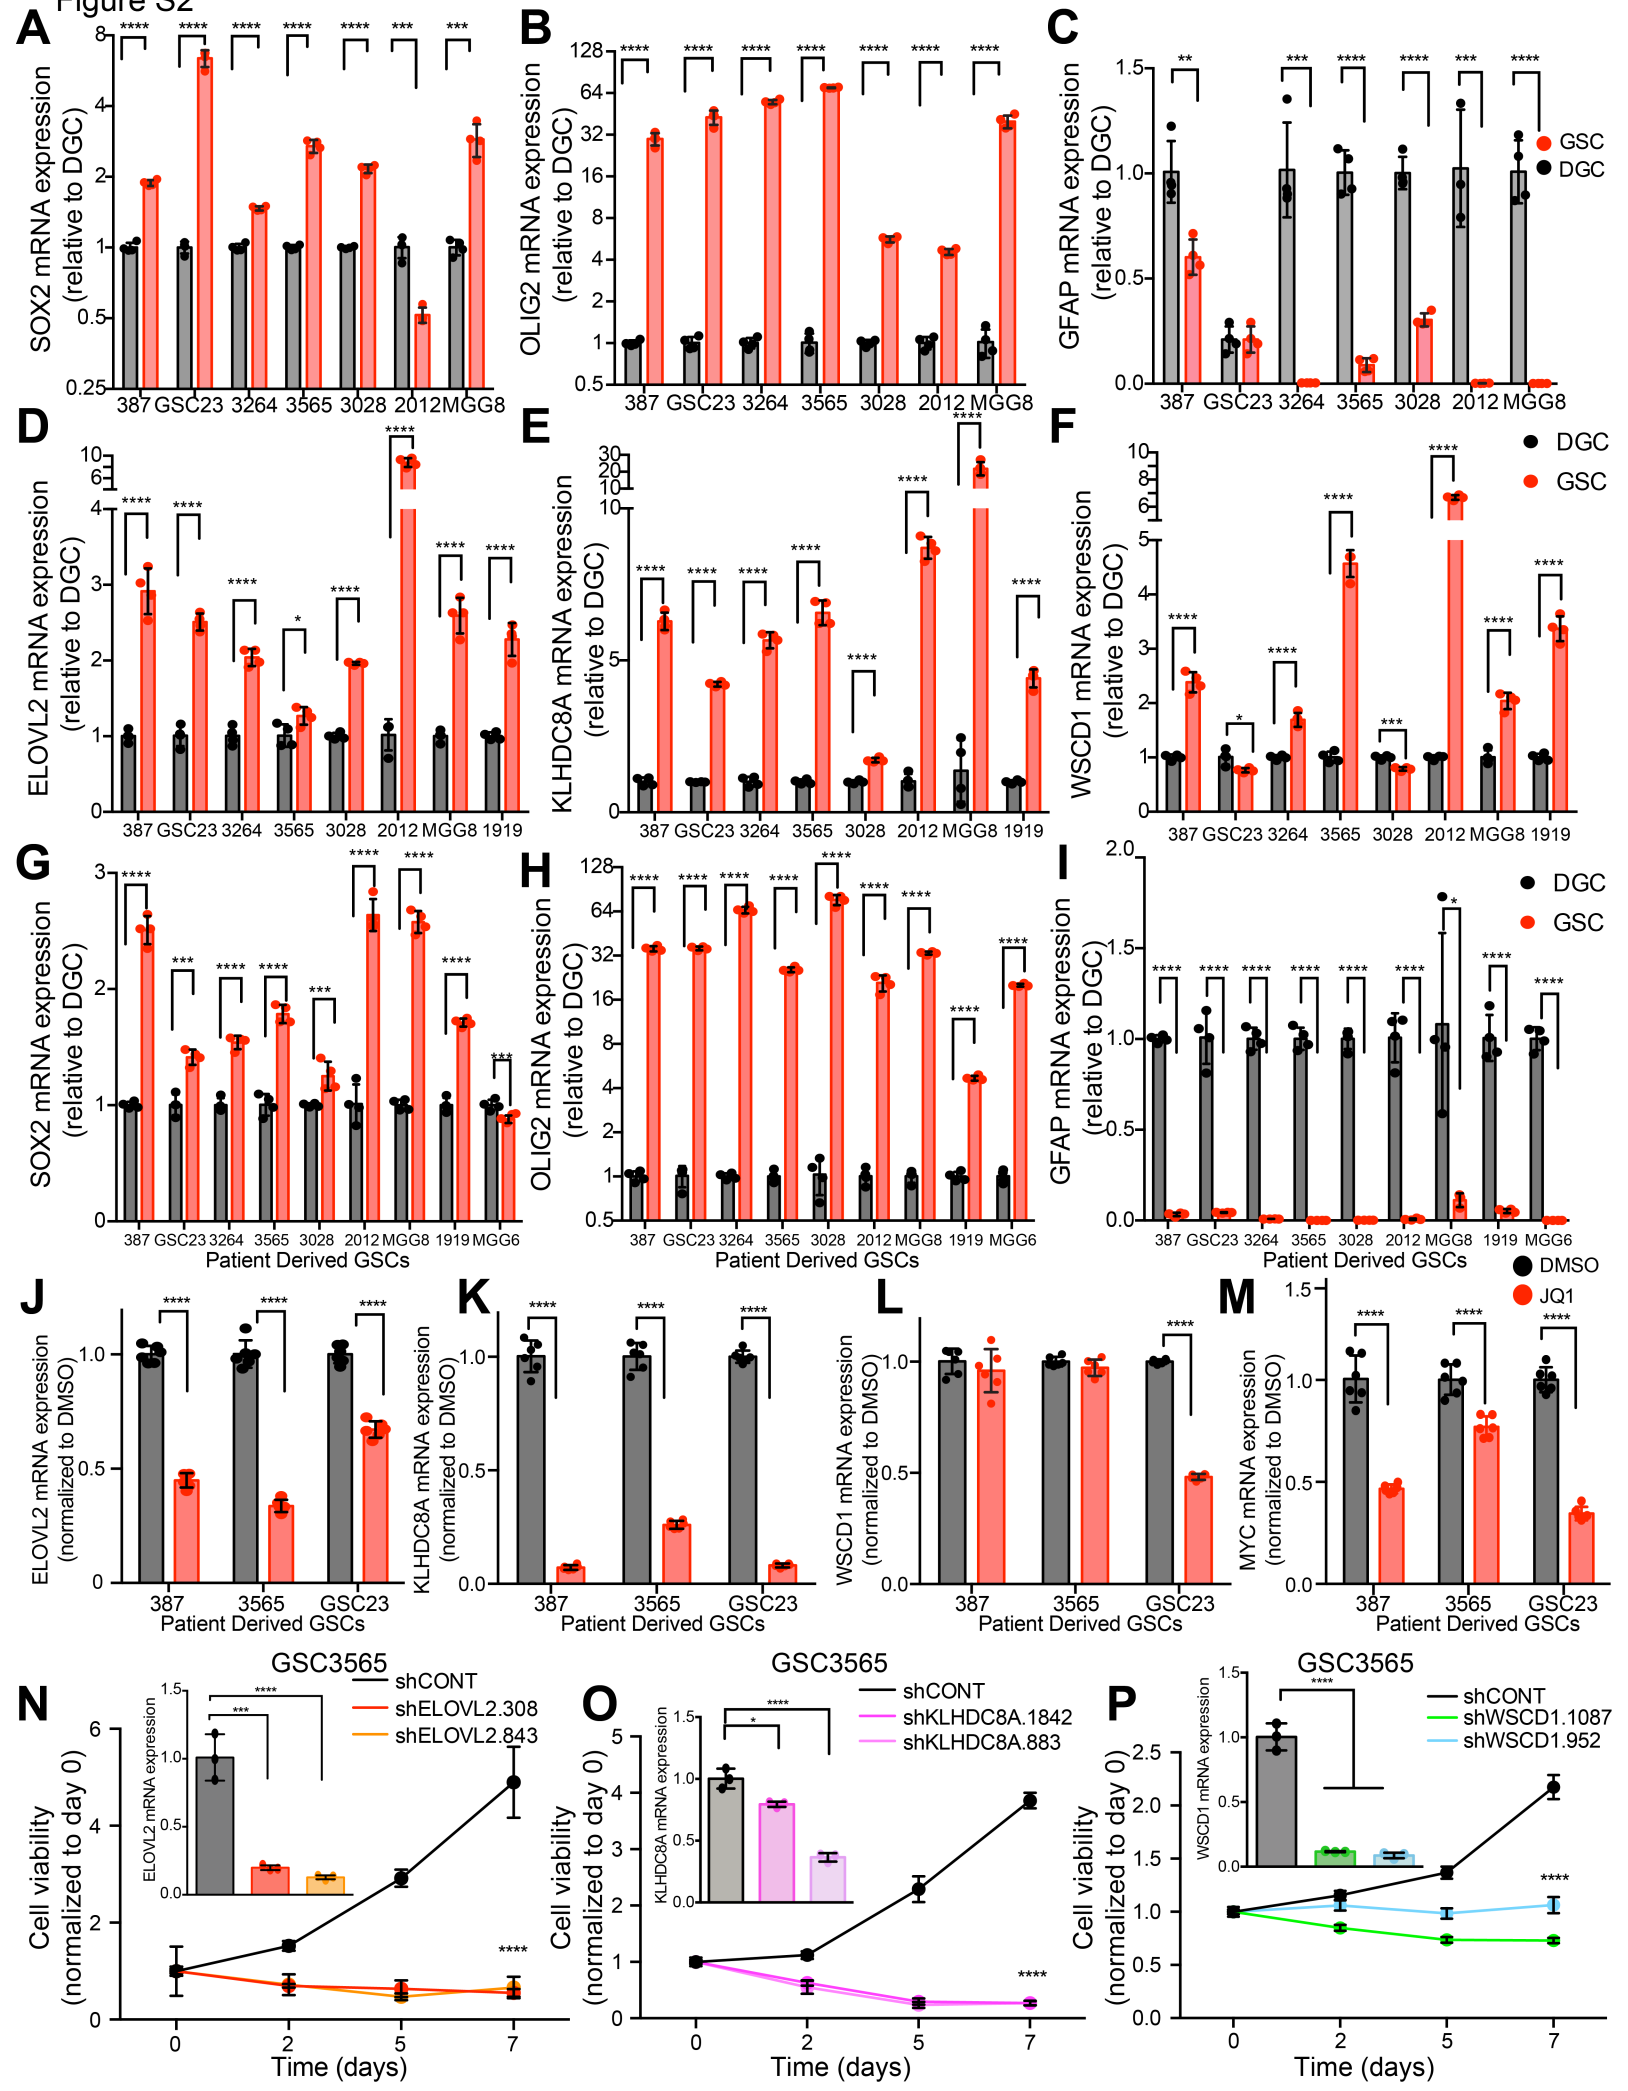

**Figure S2. Glioblastoma stem cell specific super-enhancer associated genes are essential for glioblastoma stem cell proliferation, related to Figure 2.**

- (A) qPCR analysis of mRNA expression of SOX2 in 7 matched GSCs and DGCs. Student t-test was used to assess statistical significance with four technical replicates. \*\*\*,  $p < 0.001$ . \*\*\*\*,  $p < 0.0001$ .
- (B) qPCR analysis of mRNA expression of OLIG2 in 7 matched GSCs and DGCs. Student t-test was used to assess statistical significance with four technical replicates. \*\*\*\*,  $p < 0.0001$ .
- (C) qPCR analysis of mRNA expression of GFAP in 7 matched GSCs and DGCs. Student t-test was used to assess statistical significance with four technical replicates. \*\*,  $p < 0.01$ . \*\*\*,  $p < 0.001$ . \*\*\*\*,  $p < 0.0001$ .
- (D) qPCR analysis of mRNA expression of ELOVL2 in a second derivation of 8 matched GSCs and DGCs. Student t-test was used to assess statistical significance with four technical replicates. \*,  $p < 0.05$ , \*\*\*,  $p < 0.001$ . \*\*\*\*,  $p < 0.0001$ .
- (E) qPCR analysis of mRNA expression of KLHDC8A in a second derivation of 8 matched GSCs and DGCs. Student t-test was used to assess statistical significance with four technical replicates. \*,  $p < 0.05$ , \*\*\*,  $p < 0.001$ . \*\*\*\*,  $p < 0.0001$ .
- (F) qPCR analysis of mRNA expression of WSCD1 in a second derivation of 8 matched GSCs and DGCs. Student t-test was used to assess statistical significance with four technical replicates. \*,  $p < 0.05$ , \*\*\*,  $p < 0.001$ . \*\*\*\*,  $p < 0.0001$ .
- (G) qPCR analysis of mRNA expression of SOX2 in a second derivation of 9 matched GSCs and DGCs. Student t-test was used to assess statistical significance with four technical replicates. \*\*\*,  $p < 0.001$ . \*\*\*\*,  $p < 0.0001$ .
- (H) qPCR analysis of mRNA expression of OLIG2 in a second derivation of 9 matched GSCs and DGCs. Student t-test was used to assess statistical significance with four technical replicates. \*\*\*,  $p < 0.001$ . \*\*\*\*,  $p < 0.0001$ .
- (I) qPCR analysis of mRNA expression of GFAP in a second derivation of 9 matched GSCs and DGCs. Student t-test was used to assess statistical significance with four technical replicates. \*\*\*,  $p < 0.001$ . \*\*\*\*,  $p < 0.0001$ .
- (J) qPCR analysis of mRNA expression of ELOVL2, following treatment with 1.5uM of JQ1 for 48 hours in three GSCs (GSC387, GSC3565, and GSC23) with 6 technical replicates per condition. Student's t-test with Holm-Sidak multiple test corrections, (\*\*\*\*,  $p < 0.0001$ )
- (K) Same as (J) for KLHDC8A.
- (L) Same as (J) for WSCD1.
- (M) qPCR analysis of mRNA expression of MYC, following treatment with 1.5uM of JQ1 for 48 hours in three GSCs (GSC387, GSC3565, and GSC23). Student's t-test with Holm-Sidak multiple test corrections with six technical replicates (\*\*\*\*,  $p < 0.0001$ )
- (N) Cell viability in the GSC3565 cell model was assessed over a 7-day time course following knockdown with two independent, non-overlapping shRNAs targeting ELOVL2 (shELOVL2.308, shELOVL2.843) or a non-targeting shRNA (shCONT). Two-way repeated measures ANOVA was used for statistical analysis with Dunnett's multiple hypothesis test correction with five technical replicates (\*\*\*\*,  $p < 0.0001$ ). Inset shows qPCR analysis of mRNA expression of ELOVL2 in the GSC3565 tumor model following knockdown. One-way ANOVA was used for statistical analysis

with Dunnett's multiple hypothesis test correction with three technical replicates. \*\*\*,  $p < 0.001$ . \*\*\*\*,  $p < 0.0001$ .

- (O)** Cell viability in the GSC3565 cell model was assessed over a 7-day time course following knockdown with two independent, non-overlapping shRNAs targeting KLHDC8A (shKLHDC8A.1842, shKLHDC8A.883) or a non-targeting shRNA (shCONT). Two-way repeated measures ANOVA was used for statistical analysis with Dunnett's multiple hypothesis test correction with five technical replicates (\*\*\*\*,  $p < 0.0001$ ). Inset shows qPCR analysis of mRNA expression of KLHDC8A in the GSC3565 tumor model following knockdown. One-way ANOVA was used for statistical analysis with Dunnett's multiple hypothesis test correction with three technical replicates. \*,  $p < 0.05$ . \*\*\*\*,  $p < 0.0001$ .
- (P)** Cell viability in the GSC3565 cell model was assessed over a 7-day time course following knockdown with two independent, non-overlapping shRNAs targeting WSCD1 (shWSCD1.1087, shWSCD1.952) or a non-targeting shRNA (shCONT). Two-way repeated measures ANOVA was used for statistical analysis with Dunnett's multiple hypothesis test correction with five technical replicates (\*\*\*\*,  $p < 0.0001$ ). qPCR analysis of mRNA expression of WSCD1 in the GSC3565 tumor model following knockdown. Two-way repeated measures ANOVA was used for statistical analysis with Dunnett's multiple hypothesis test correction with three technical replicates. \*\*\*\*,  $p < 0.0001$ .

Figure S3

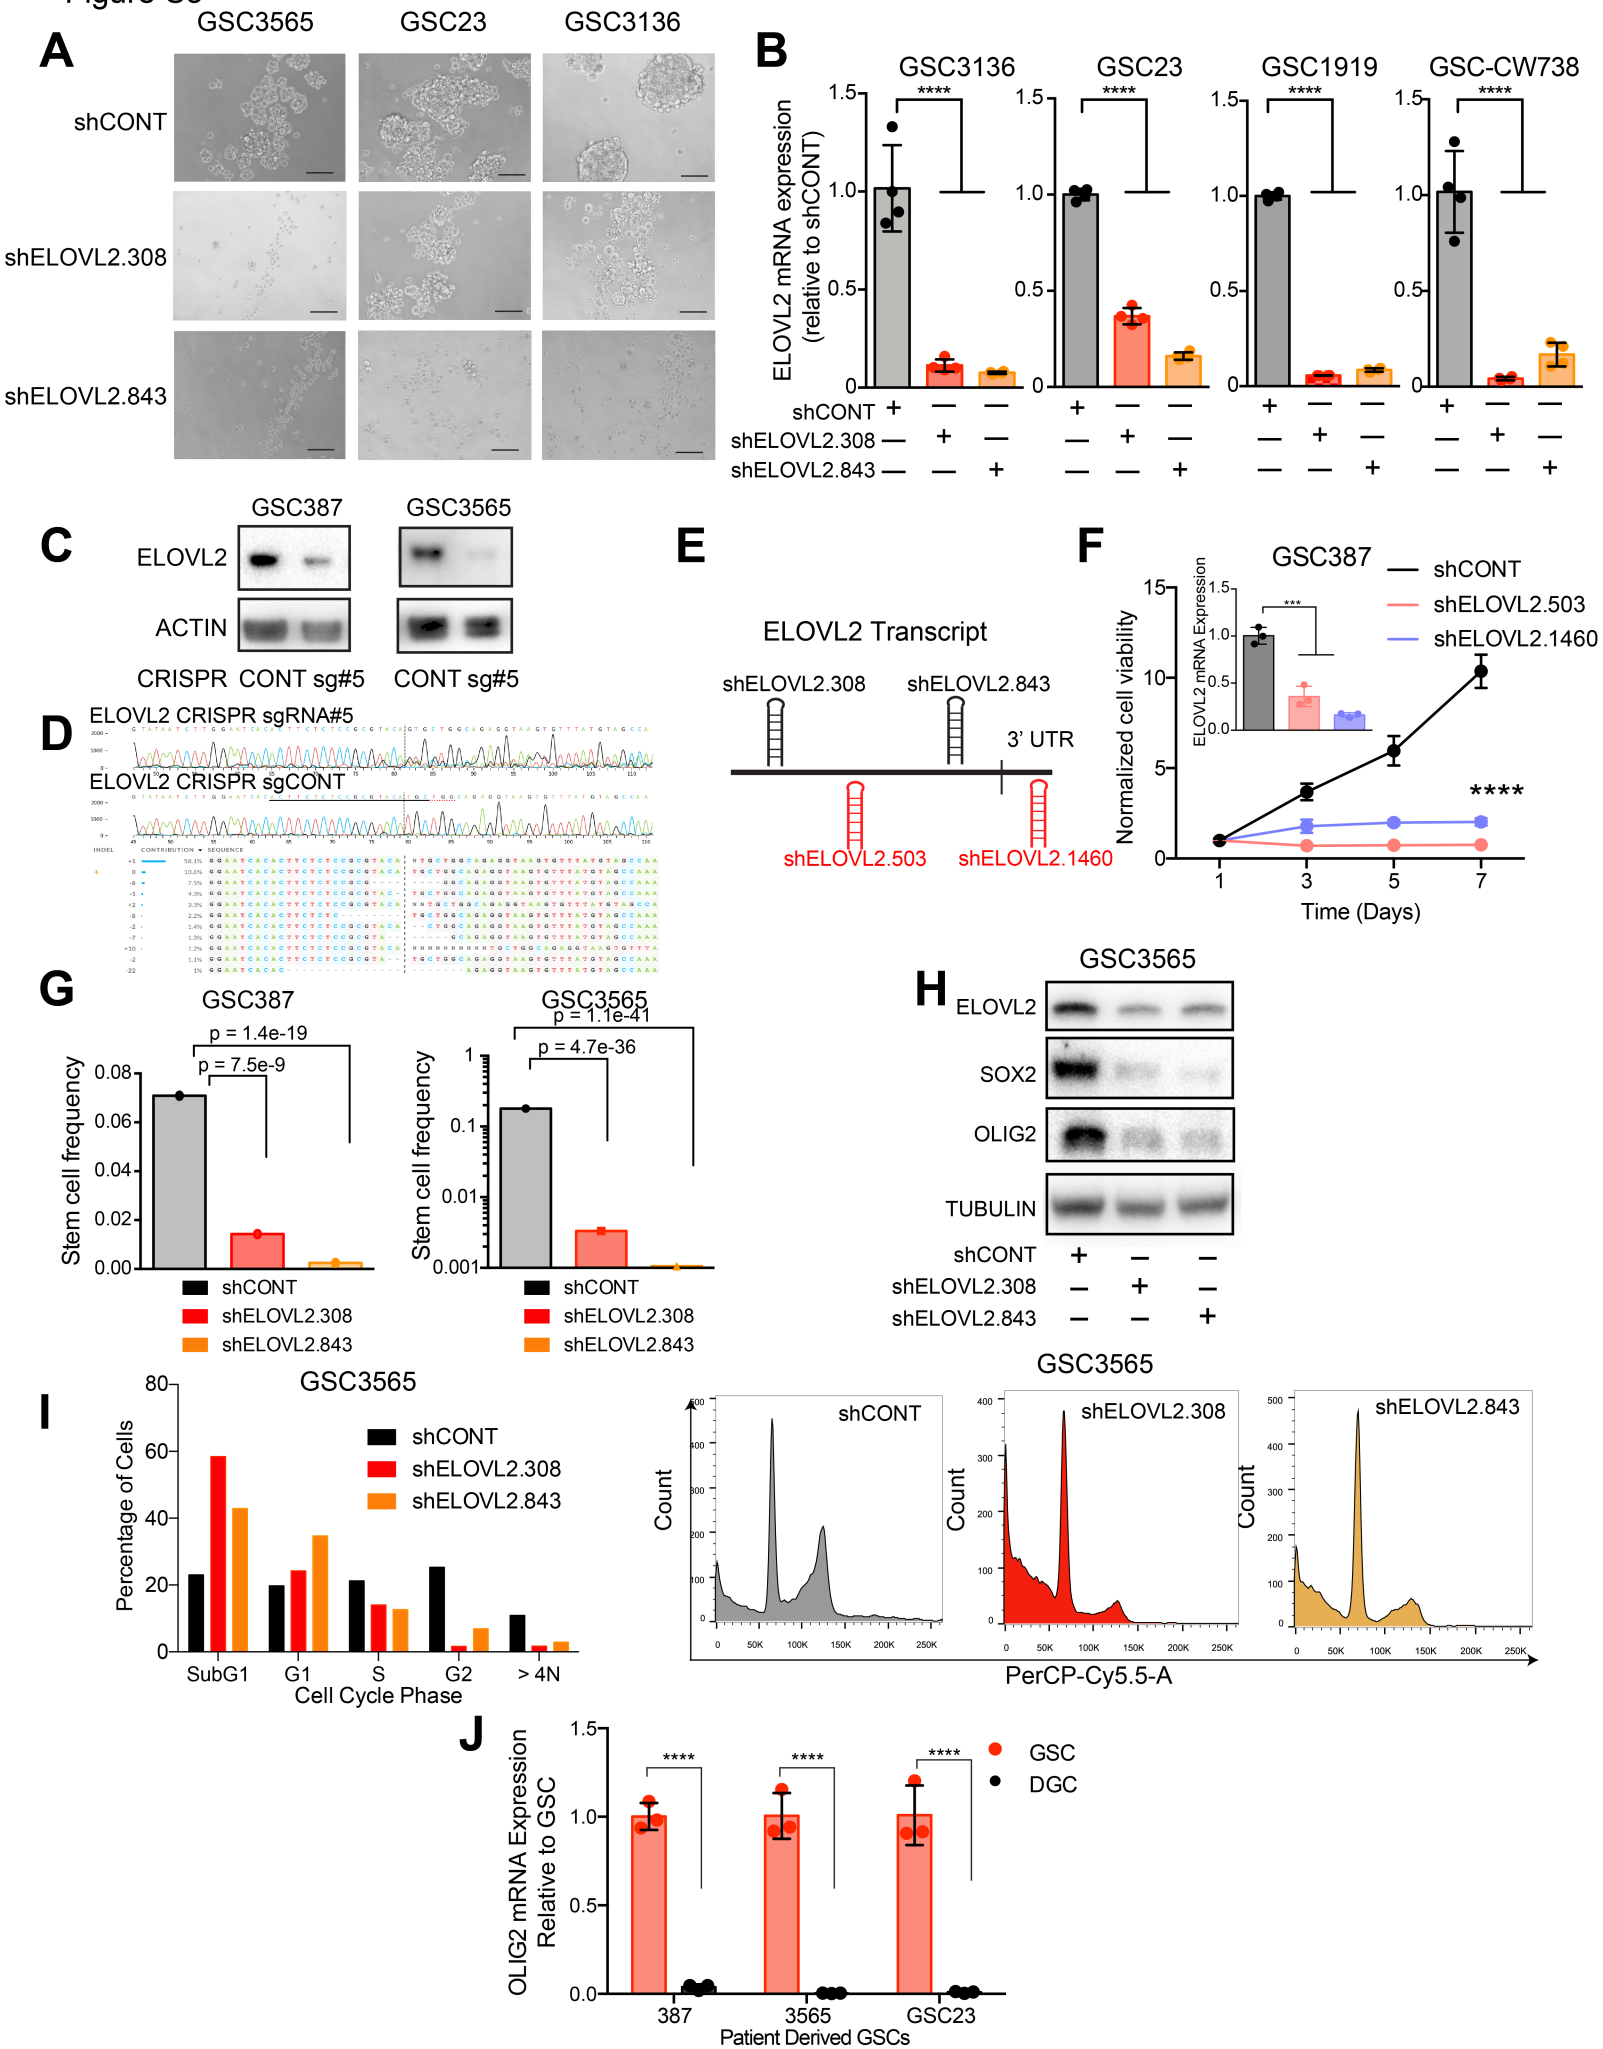

**Figure S3. ELOVL2 knockdown and knockout impairs cell proliferation capacity in glioblastoma stem cells, related to Figure 4.**

- (A) Representative cell images 4 days following knockdown with two independent, non-overlapping shRNAs targeting ELOVL2 (shELOVL2.308, shELOVL2.843) or a non-targeting shRNA (shCONT). The scale bar represents 200  $\mu$ m.
- (B) qPCR analysis of mRNA expression of ELOVL2 in four GSCs following knockdown with two independent, non-overlapping shRNAs targeting ELOVL2 (shELOVL2.308, shELOVL2.843) or a non-targeting shRNA (shCONT). One-way ANOVA was used for statistical analysis with Dunnett's multiple hypothesis test correction with four technical replicates. \*\*\*\*,  $p < 0.0001$ .
- (C) Western blot showing ELOVL2 protein levels following CRISPR-Cas9 mediated knockout of ELOVL2. Actin was used as a loading control.
- (D) Genomic DNA flanking the ELOVL2 CRISPR-Cas9 cut site was PCR amplified and subjected to Sanger sequencing. Sequencing tracks from the non-targeting sgRNA (sgCONT) and sgRNA targeting ELOVL2 are displayed with insertion/deletion sites.
- (E) Schematic of shRNAs targeting the ELOVL2 mRNA.
- (F) Cell viability in GSC387 over a 7-day time course following knockdown with two independent, non-overlapping shRNAs targeting ELOVL2 (shELOVL2.503, shELOVL2.1460) or a non-targeting shRNA (shCONT). 5 technical replicates were used for each condition. Two-way repeated measures ANOVA with Dunnett's multiple hypothesis test correction (\*\*\*\*,  $p < 0.0001$ ). Inset shows qPCR demonstrating ELOVL2 expression following treatment with two independent non-overlapping shRNAs targeting ELOVL2 (\*\*\*,  $p < 0.001$ ).
- (G) Quantification of stem cell frequency from in vitro limiting dilution assay.
- (H) Western blot following ELOVL2 knockdown with two independent, non-overlapping shRNAs targeting ELOVL2 (shELOVL2.308, shELOVL2.843) or a non-targeting shRNA (shCONT). Tubulin was used as a loading control.
- (I) Cell cycle analysis of the GSC3565 cell model 3 days following knockdown with two independent, non-overlapping shRNAs targeting ELOVL2 (shELOVL2.308, shELOVL2.843) or a non-targeting shRNA (shCONT).
- (J) qPCR analysis of OLIG2 mRNA expression in paired GSCs and DGCs derived from GSC387, GSC3565, and GSC23. Two-way ANOVA with Sidak multiple test correction was used for statistical analysis. \*\*\*\*,  $p < 0.0001$ .

Figure S4

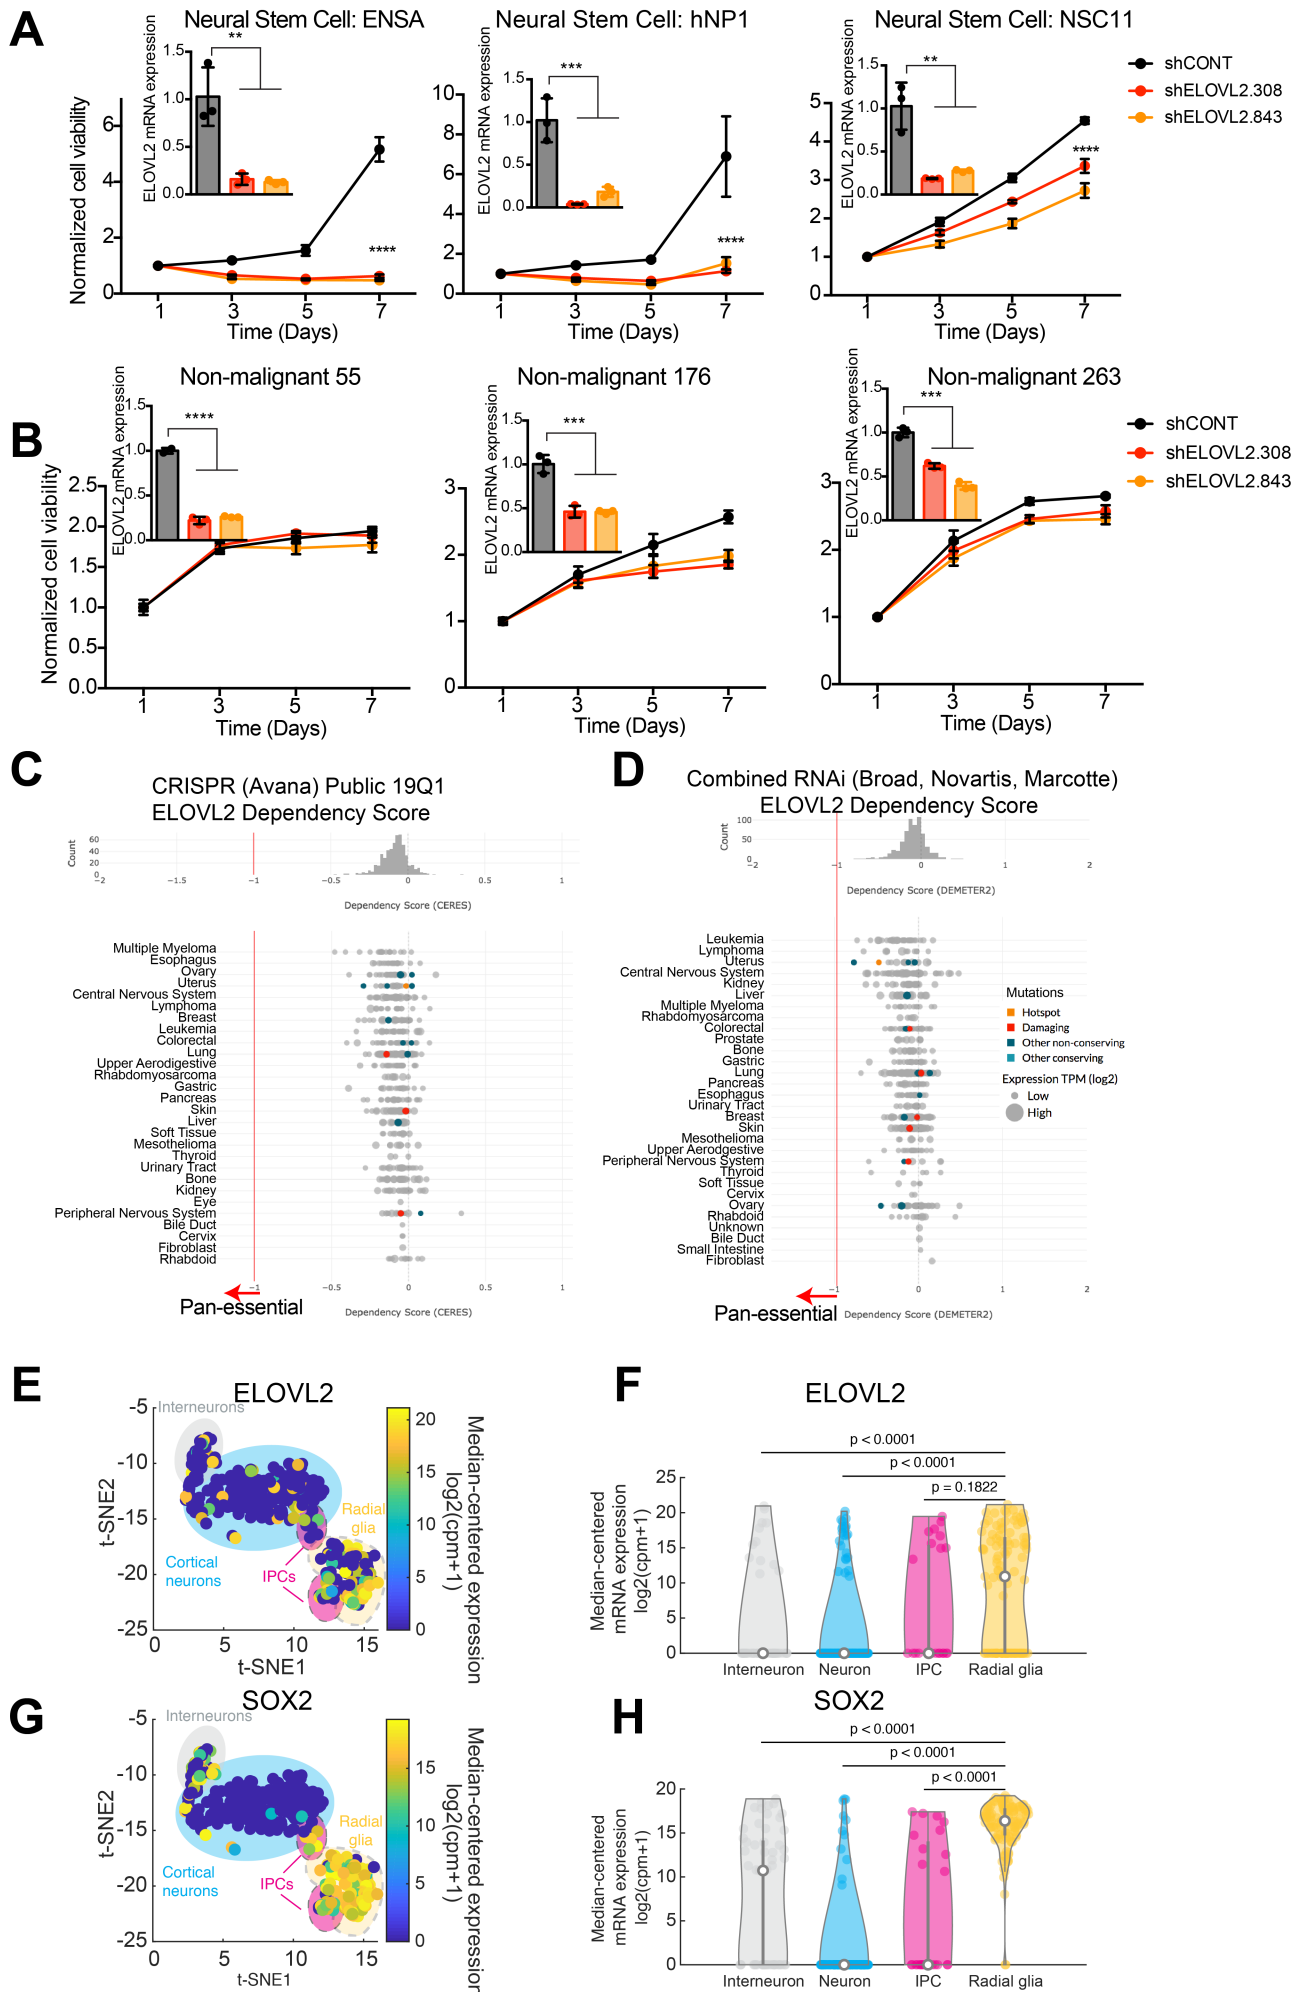



**Figure S4. ELOVL2 marks stem cell populations and is not a pan-essential gene, related to Figure 4.**

- (A)** Cell viability in three neural stem cells (ENSA, hNP1, and NSC11) was assessed over a 7-day time course following knockdown with two independent, non-overlapping shRNAs targeting ELOVL2 (shELOVL2.308, shELOVL2.843) or a non-targeting shRNA (shCONT). Two-way repeated measures ANOVA was used for statistical analysis with Dunnett's multiple hypothesis test correction with five technical replicates (\*\*\*\*,  $p < 0.0001$ ). Inset shows qPCR analysis of mRNA expression of ELOVL2 following knockdown. One-way ANOVA was used for statistical analysis with Dunnett's multiple hypothesis test correction with three technical replicates. \*\*,  $p < 0.01$ . \*\*\*,  $p < 0.001$ .
- (B)** Cell viability in three non-malignant neural cells derived from epilepsy tissue resection specimens (NM55, NM176, and NM263) was assessed over a 7-day time course following knockdown with two independent, non-overlapping shRNAs targeting ELOVL2 (shELOVL2.308, shELOVL2.843) or a non-targeting shRNA (shCONT). Inset shows qPCR analysis of mRNA expression of ELOVL2 following knockdown. One-way ANOVA was used for statistical analysis with Dunnett's multiple hypothesis test correction with three technical replicates. \*\*\*,  $p < 0.001$ . \*\*\*\*,  $p < 0.0001$ .
- (C)** ELOVL2 dependency score in a whole genome CRISPR-Cas9 screen across 558 cancer cell lines. A lower score means that a gene is more likely to be dependent in a given cell line. A score of 0 is equivalent to a gene that is not essential whereas a score of -1 corresponds to the median of all common essential genes. Data were derived from the Cancer Dependency Map ([www.depmap.org](http://www.depmap.org)). Dependency score is calculated using the CERES algorithm.
- (D)** ELOVL2 dependency score in a whole genome shRNA screen across 711 cancer cell lines. Dependency score is calculated using the DEMETER2 algorithm.
- (E)** Single-cell RNA-sequencing (scRNA-seq) data from normal brain specimens derived from (31) presented as a t-Distributed Stochastic Neighbor Embedding (t-SNE) plot demonstrating expression of ELOVL2 across brain cell types. Data is presented as median centered mRNA expression in counts per million (CPM). IPC denotes intermediate progenitor cells.
- (F)** Quantification of data in (E).
- (G)** Same as (E) for SOX2 mRNA expression.
- (H)** Quantification of data in (G).

Figure S5

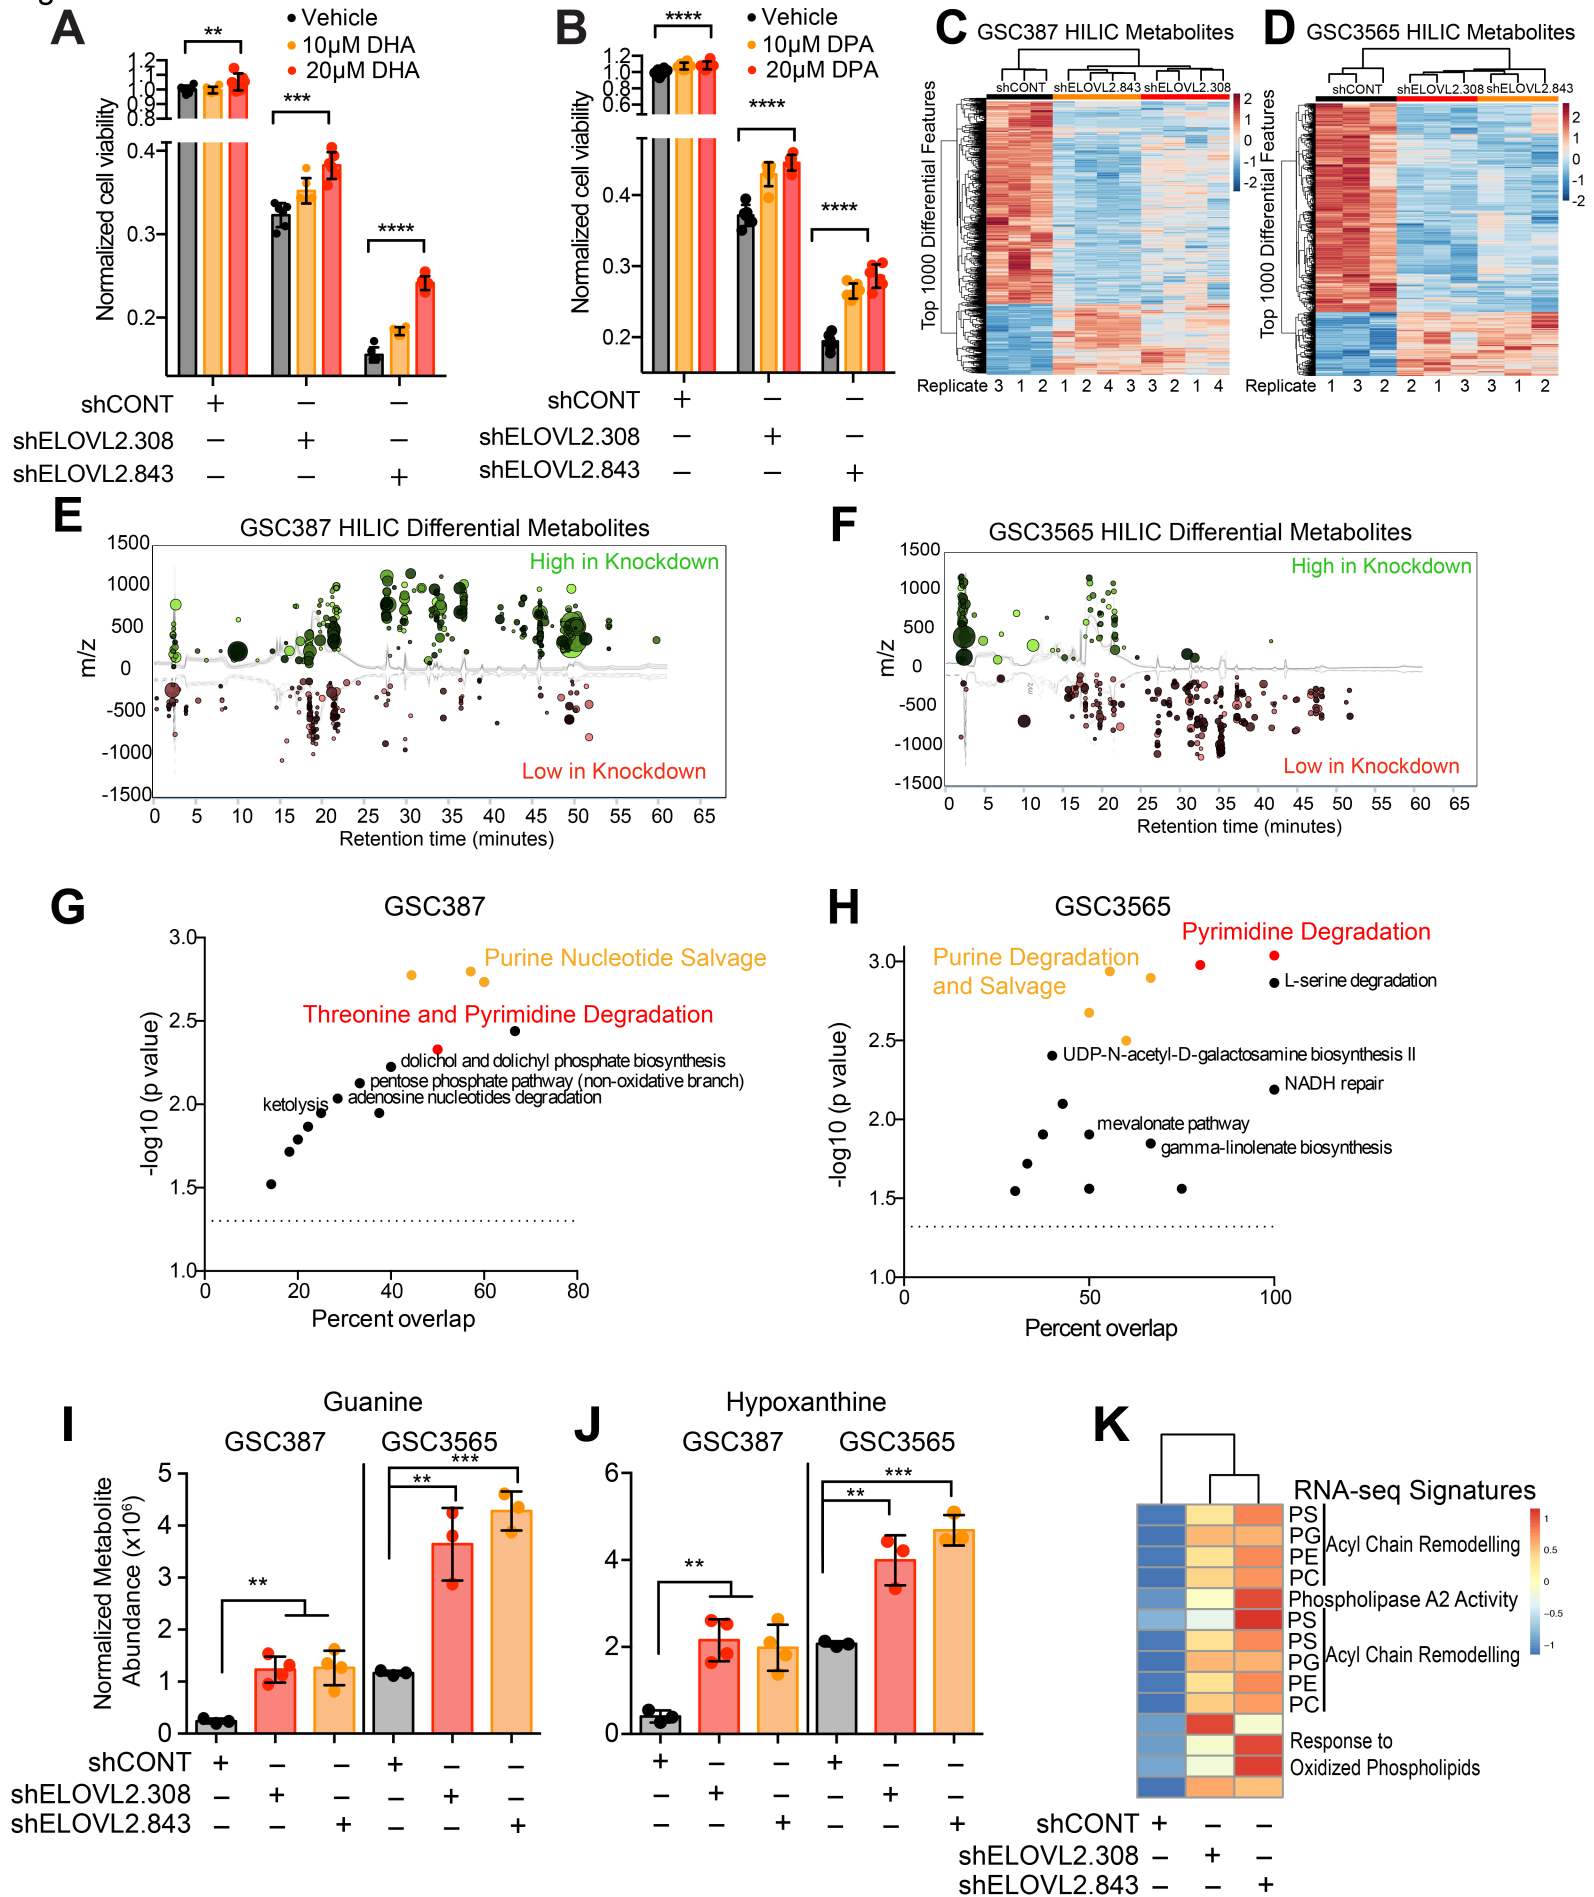

**Figure S5. Global metabolomics analysis reveals enrichment in purine salvage and pyrimidine degradation pathways following ELOVL2 knockdown, related to Figure 5.**

- (A)** Cell viability in GSC387 following knockdown with two independent, non-overlapping shRNAs targeting ELOVL2 or a non-targeting shRNA (shCONT). Cells were treated with vehicle, 10  $\mu$ M, or 20  $\mu$ M of docosahexaenoic acid (DHA). Statistical significance was assessed using two-way ANOVA with Dunnett multiple test correction with six technical replicates. \*\*,  $p < 0.01$ ; \*\*\*,  $p < 0.001$ ; \*\*\*\*,  $p < 0.0001$ .
- (B)** Same as (A) with docosapentaenoic acid (DPA).
- (C)** Heatmap displaying the top 1,000 differential mass spectrometry features in the negative mode (HILIC) in the GSC387 model following knockdown with two independent, non-overlapping shRNAs targeting ELOVL2 (shELOVL2.308, shELOVL2.843) or a non-targeting shRNA (shCONT).
- (D)** Heatmap displaying the top 1,000 differential mass spectrometry features in the negative mode (HILIC) in the GSC3565 model following knockdown with two independent, non-overlapping shRNAs targeting ELOVL2 (shELOVL2.308, shELOVL2.843) or a non-targeting shRNA (shCONT).
- (E)** Pathway cloud plot showing differential mass spectrometry features in the GSC387 model when analyzed in the negative mode (HILIC).
- (F)** Pathway cloud plot showing differential mass spectrometry features in the GSC3565 model when analyzed in the negative mode (HILIC).
- (G)** Pathway analysis of differential putative metabolites in the GSC387 model following ELOVL2 knockdown as determined through mass spectrometry in the negative mode (HILIC).
- (H)** Pathway analysis of differential putative metabolites in the GSC387 model following ELOVL2 knockdown as determined through mass spectrometry in the negative mode (HILIC).
- (I)** Metabolite abundance of guanine following knockdown with two independent, non-overlapping shRNAs targeting ELOVL2 (shELOVL2.308, shELOVL2.843) or a non-targeting shRNA (shCONT). One-way ordinary ANOVA was used for comparisons with three technical replicates. \*\*,  $p < 0.01$ . \*\*\*,  $p < 0.001$ .
- (J)** Metabolite abundance of hypoxanthine following knockdown with two independent, non-overlapping shRNAs targeting ELOVL2 (shELOVL2.308, shELOVL2.843) or a non-targeting shRNA (shCONT). One-way ordinary ANOVA was used for comparisons with three technical replicates. \*\*,  $p < 0.01$ . \*\*\*,  $p < 0.001$ .
- (K)** Heatmap displays differential transcriptional signatures derived from RNA-sequencing following knockdown with two independent, non-overlapping shRNAs targeting ELOVL2 or a non-targeting shRNA (shCONT).

**A** Figure S6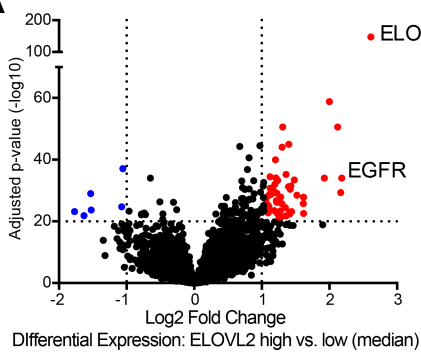**B**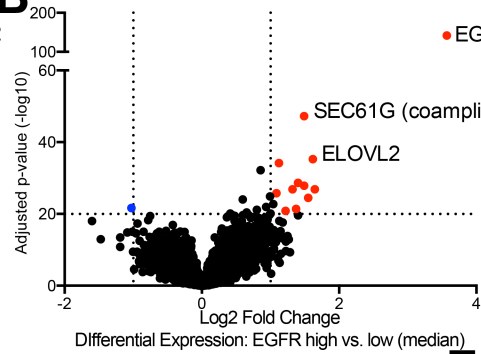**C**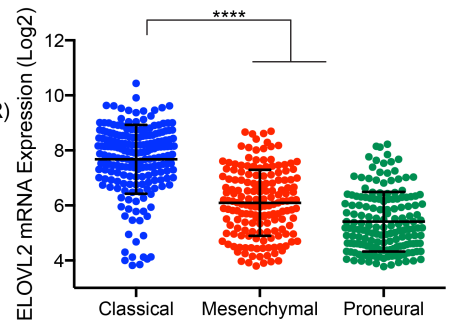**D**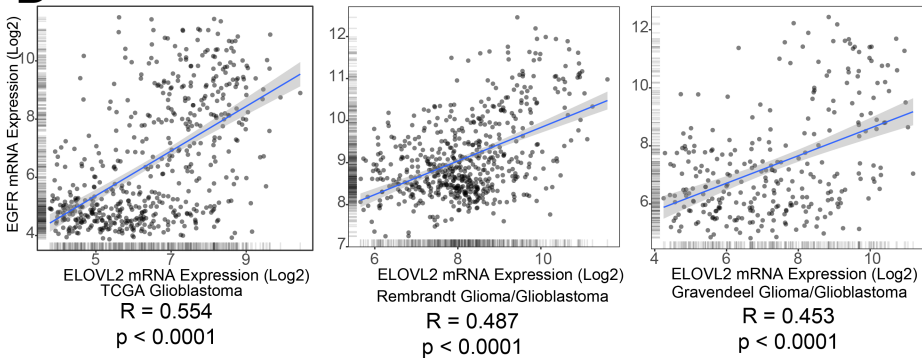**E**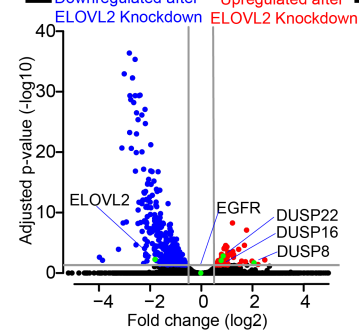**F**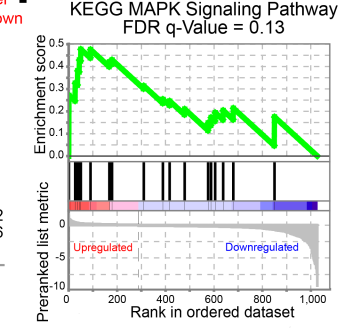**G**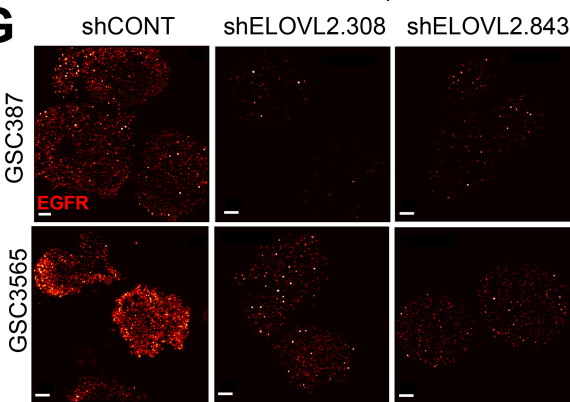**I**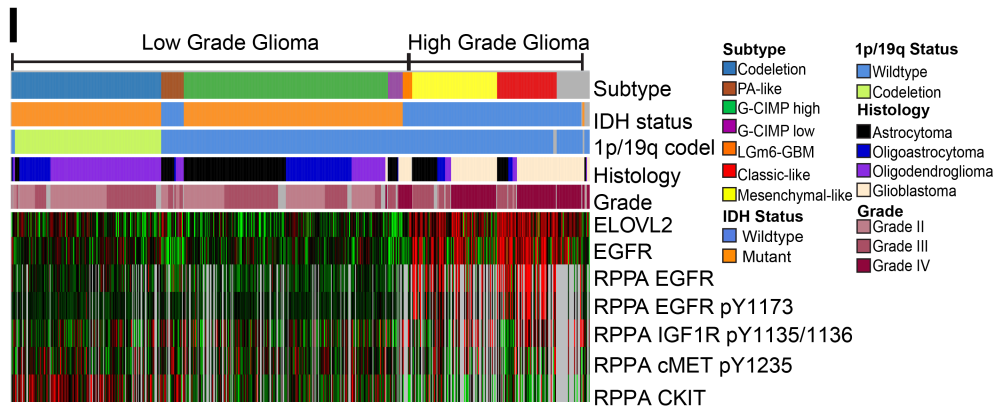**H**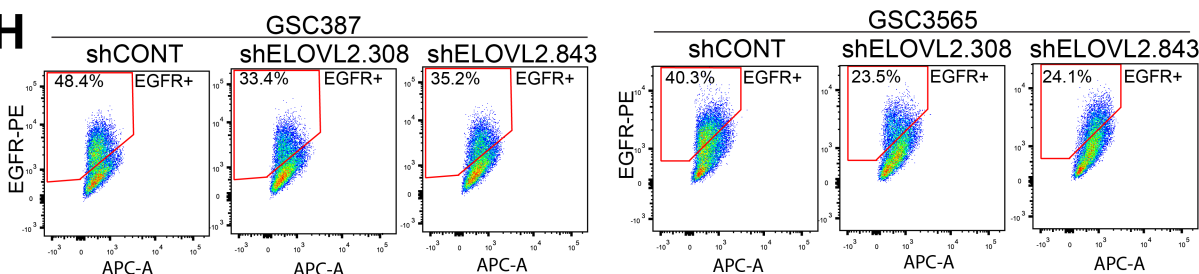**J**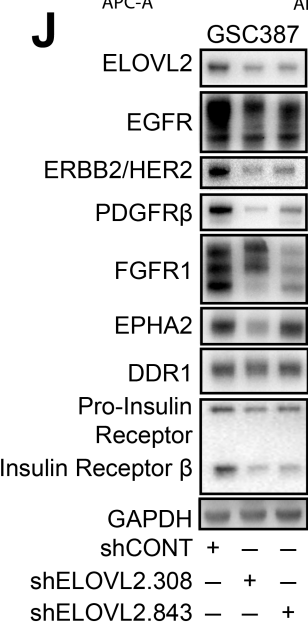**K**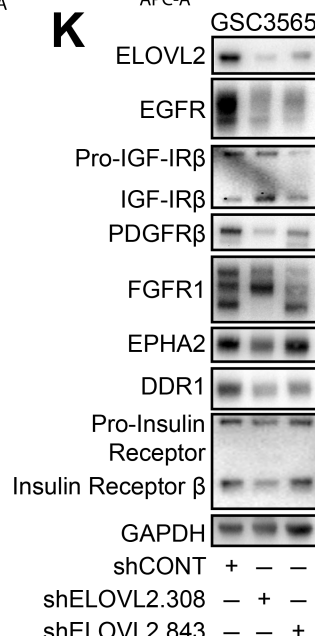**L**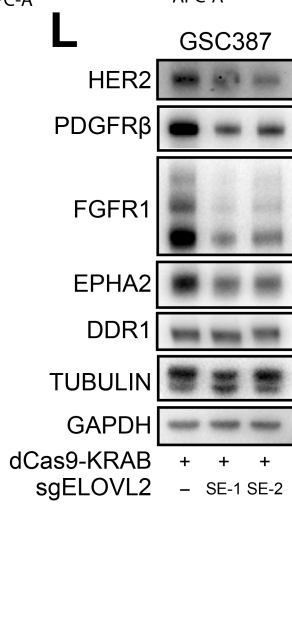**M**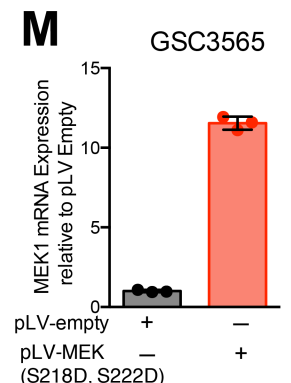**N**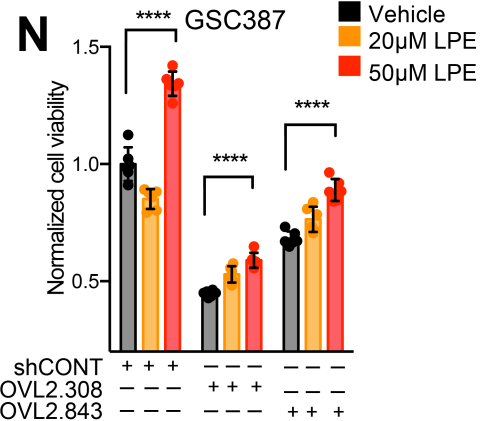

**Figure S6. Polyunsaturated fatty acid synthesis supports EGFR signaling in glioblastoma stem cells, related to Figure 6.**

- (A) Volcano plot demonstrating differentially expressed genes in the TCGA HG-U133A microarray glioblastoma dataset between ELOVL2 high and ELOVL2 low specimens, using the median ELOVL2 mRNA expression as a cutoff.
- (B) Volcano plot demonstrating differentially expressed genes in the TCGA HG-U133A microarray glioblastoma dataset between EGFR high and EGFR low specimens, using the median EGFR mRNA expression as a cutoff.
- (C) ELOVL2 mRNA expression from The Cancer Genome Atlas (TCGA) HG-U133A glioblastoma microarray between three transcriptional subtypes. Statistical significance was assessed using ordinary one-way ANOVA with Tukey multiple comparison correction. \*\*\*\*,  $p < 0.0001$  for all pairwise comparisons.
- (D) Correlation between ELOVL2 and EGFR was calculated in (left) the TCGA HG-U133A glioblastoma dataset, (middle) the Rembrandt glioma/glioblastoma dataset, and (right) the Gravendeel glioma/glioblastoma dataset.
- (E) Volcano plot showing results of differential expression RNA-seq analysis in GSC387 and GSC3565.
- (F) Gene set enrichment plot for the KEGG MAPK Signaling pathway. Genes were ranked based on the p-value significance of their differential expression between shCONT and shELOVL2.308/shELOVL2.843. FDR-corrected q-value = 0.13.
- (G) Super-resolution stochastic optical reconstruction microscopy (STORM) imaging of EGFR following knockdown with two independent, non-overlapping shRNAs targeting ELOVL2 (shELOVL2.308, shELOVL2.843) or a non-targeting shRNA (shCONT) in the GSC387 and GSC3565 model. Scalebar shows 2  $\mu\text{m}$ .
- (H) Flow cytometry analysis of cell surface EGFR following knockdown with two independent, non-overlapping shRNAs targeting ELOVL2 or a non-targeting shRNA (shCONT) in GSC387 and GSC3565 with three technical replicates.
- (I) Heatmap showing glioma subtype and clinical characteristics from the TCGA dataset. ELOVL2 and EGFR mRNA expression from the HG-U133A glioma microarray is presented with reverse phase protein array (RPPA) data for receptor tyrosine kinases.
- (J) Western blot in GSC387 following knockdown with two independent, non-overlapping shRNAs targeting ELOVL2 (shELOVL2.308, shELOVL2.843) or a non-targeting shRNA (shCONT). GAPDH is used as a loading control.
- (K) Western blot in GSC3565 following knockdown with two independent, non-overlapping shRNAs targeting ELOVL2 (shELOVL2.308, shELOVL2.843) or a non-targeting shRNA (shCONT). GAPDH is used as a loading control.
- (L) Western blot GSC387 cells following treatment with dCas9-KRAB and two sgRNAs targeting the ELOVL2 super-enhancer critical region or an empty dCas9-KRAB vector. TUBULIN and GAPDH are used as loading controls.
- (M) qPCR analysis of mRNA expression of MEK1 (MAP2K1) in GSC3565 following treatment with a constitutive active MEK (S218D, S222D) or an empty vector.
- (N) Cell viability in GSC387 following knockdown with two independent, non-overlapping shRNAs targeting ELOVL2 or a non-targeting shRNA (shCONT). Cells were treated with vehicle, 20  $\mu\text{M}$ , or

50  $\mu\text{M}$  of lysophosphatidylethanolamine. Statistical significance was assessed using two-way ANOVA with Dunnett multiple test correction with six technical replicates. \*\*\*\*,  $p < 0.0001$ .

Figure S7

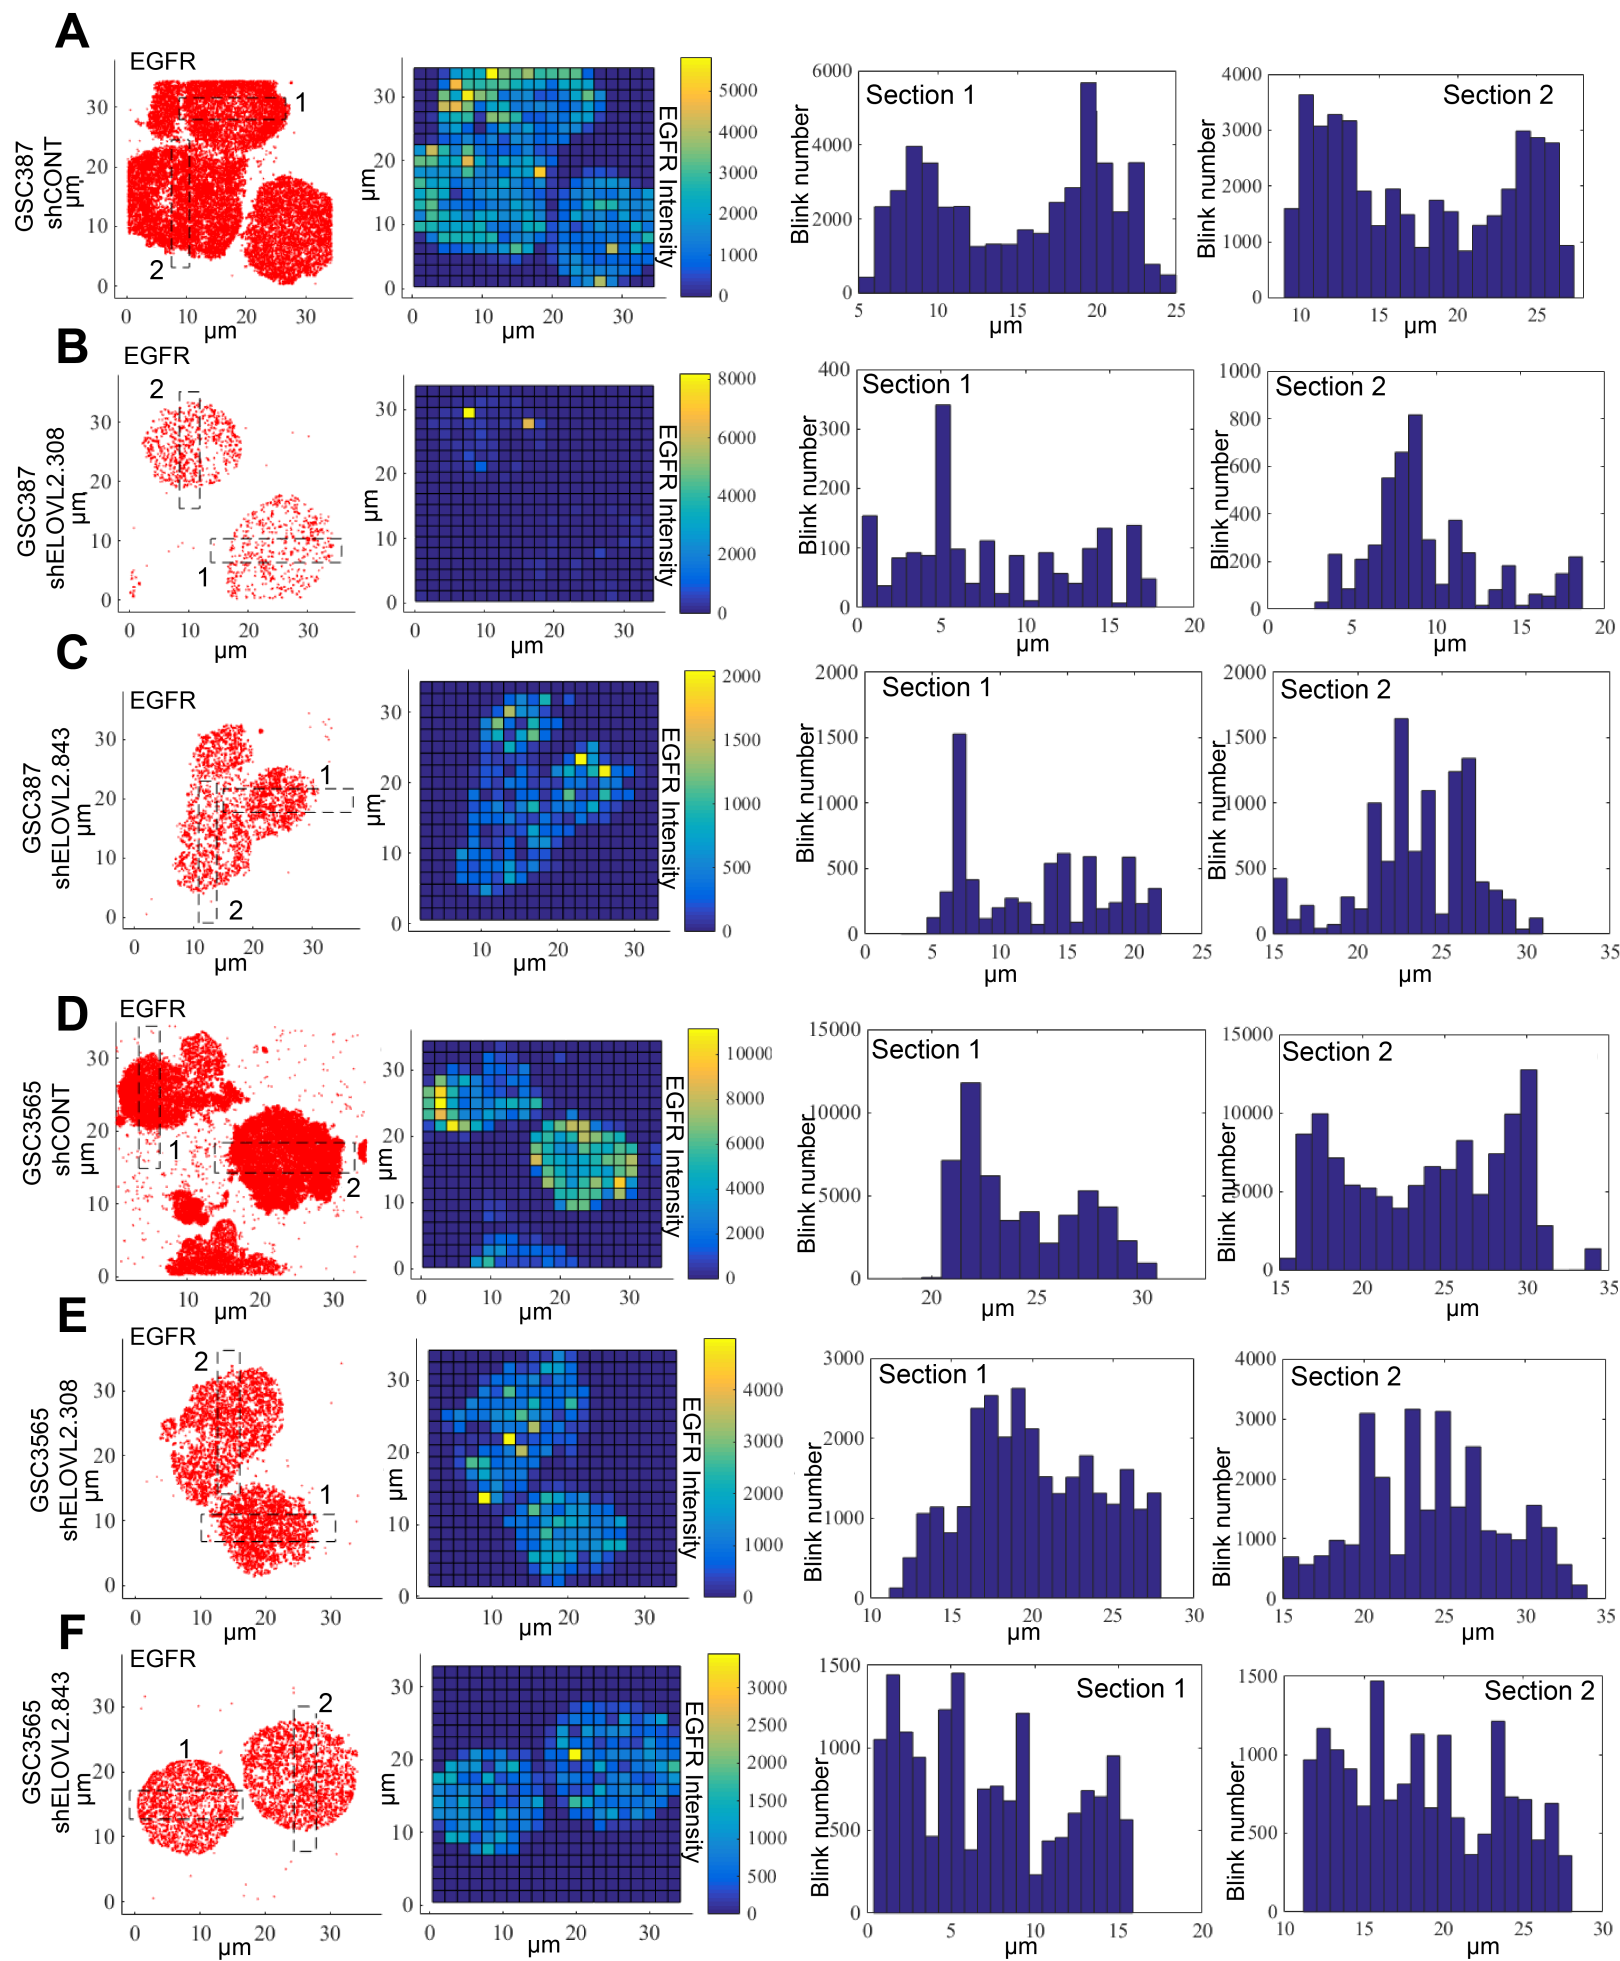

**Figure S7. ELOVL2 knockdown abolishes preferential localization of EGFR to cell membrane, related to Figure 6.**

- (A) Stochastic optical reconstruction microscopy (STORM) imaging of GSC387 following treatment with a non-targeting shRNA (shCONT) showing (Left) EGFR density with bivariate histogram plot of blink number (right) histogram of blink numbers corresponding to EGFR density across two different 4  $\mu\text{m}$  sections that cross the center of the cell.
- (B) Same as (A) following treatment with an shRNA targeting ELOVL2 (shELOVL2.308).
- (C) Same as (A) following treatment with an shRNA targeting ELOVL2 (shELOVL2.843).
- (D) Stochastic optical reconstruction microscopy (STORM) imaging of GSC3565 following treatment with a non-targeting shRNA (shCONT) showing (Left) EGFR density with bivariate histogram plot of blink number (right) histogram of blink numbers corresponding to EGFR density across two different 4  $\mu\text{m}$  sections that cross the center of the cell.
- (E) Same as (D) following treatment with an shRNA targeting ELOVL2 (shELOVL2.308).
- (F) Same as (D) following treatment with an shRNA targeting ELOVL2 (shELOVL2.843).



Figure S8

**A** Reactome Remodelling of Phosphatidylethanolamine

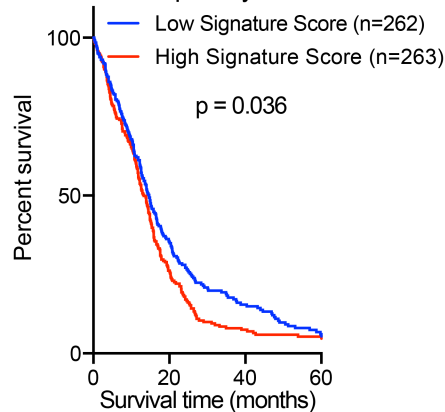

**B** KEGG Ether Lipid Metabolism

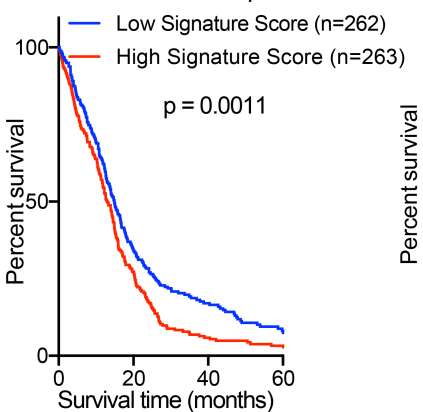

**C** GO Regulation of Phospholipid Biosynthetic Process

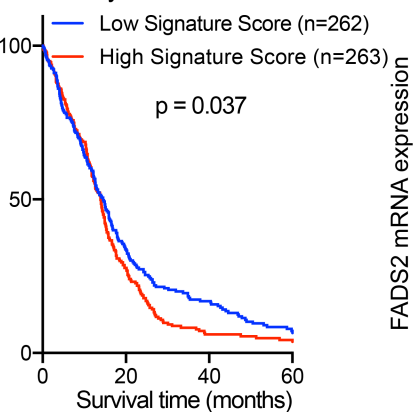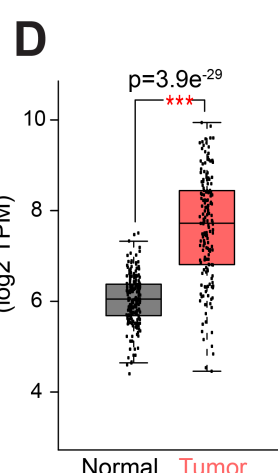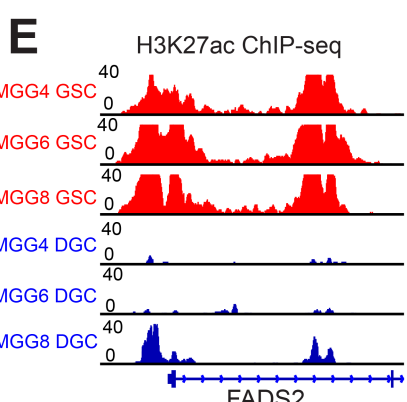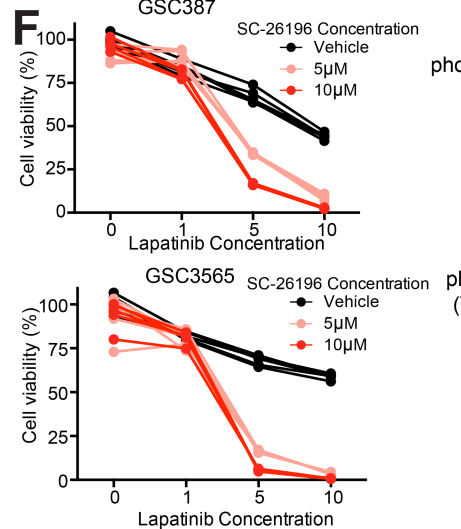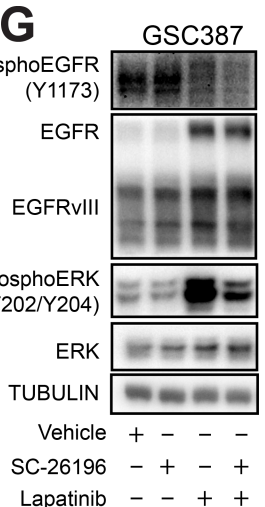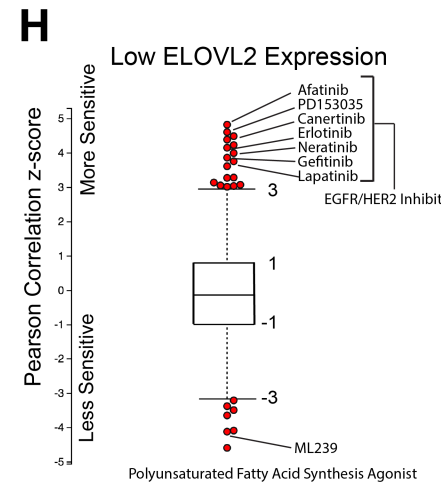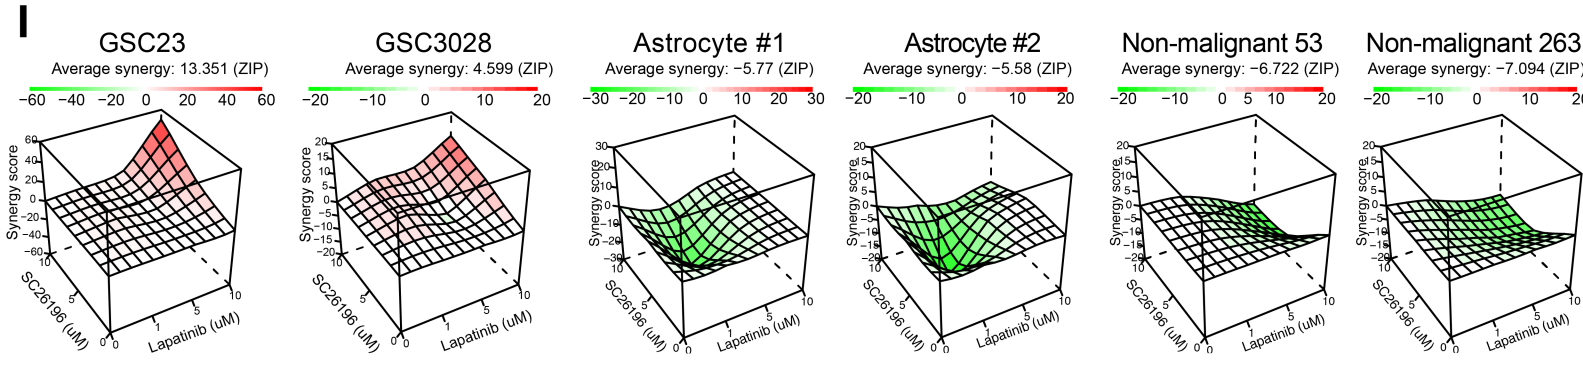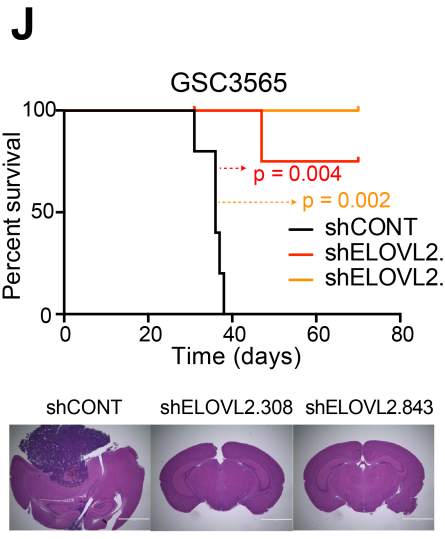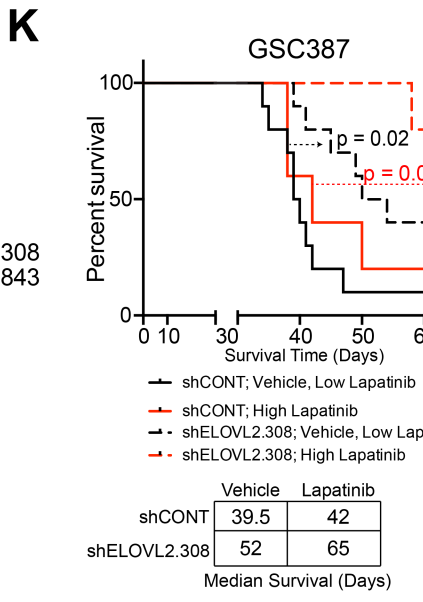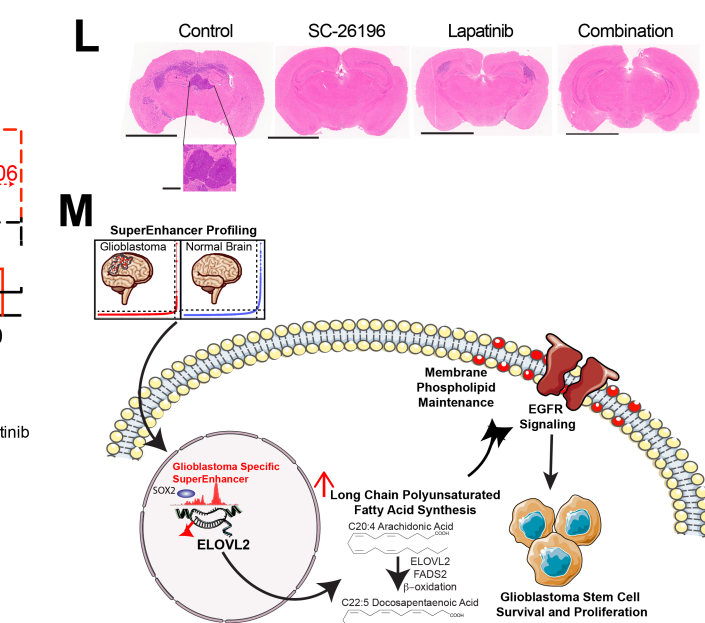

**Figure S8. Polyunsaturated fatty acid synthesis is a potential clinical target in glioblastoma, related to Figure 7.**

- (A) Kaplan-Meier curve showing survival of patients in the TCGA HG-U133A glioblastoma dataset stratified based on signature score from the “Reactome remodeling of phosphatidylethanolamine” signature. Log-rank analysis ( $p=0.0036$ , “Signature low”  $n=262$ , “Signature high”  $n=263$ ).
- (B) Kaplan-Meier curve showing survival of patients in the TCGA HG-U133A glioblastoma dataset stratified based on signature score from the “KEGG ether lipid metabolism” signature. Log-rank analysis ( $p=0.0011$ , “Signature low”  $n=262$ , “Signature high”  $n=263$ ).
- (C) Kaplan-Meier curve showing survival of patients in the TCGA HG-U133A glioblastoma dataset stratified based on signature score from the “GO regulation of phospholipid biosynthetic process” signature. Log-rank analysis ( $p=0.037$ , “Signature low”  $n=262$ , “Signature high”  $n=263$ ).
- (D) mRNA expression TPM values in normal brain (GTEx,  $n=207$ ) and glioblastoma (TCGA,  $n=163$ ) from RNA-seq data for FADS2. Four-way ANOVA controlling for sex, age, and ethnicity with Benjamini and Hochberg false discovery rate (FDR) method,  $p=3.9e-29$ .
- (E) H3K27ac signal at the FADS2 promoter region in three matched GSCs and DGCs (MGG4, MGG6, and MGG8). Data was derived from (26).
- (F) Cell viability of GSC387 and GSC3565 following combinatorial treatment with lapatinib or SC-26196. Six technical replicates were used.
- (G) Western blot following treatment with lapatinib (5  $\mu\text{M}$ ), SC-26196 (10  $\mu\text{M}$ ), or a combination. Tubulin was used as a loading control.
- (H) Cancer cell viability data from 860 cell lines in response to 481 compounds is stratified based on ELOVL2 expression. For each compound, the Pearson correlation z-score between drug sensitivity and ELOVL2 expression is plotted with positive values indicating that low ELOVL2 expression is associated with increased sensitivity to the compound and positive values indicating that low ELOVL2 expression is associated with decreased sensitivity to the compound. Data was accessed from the Cancer Therapeutics Response Portal (<https://portals.broadinstitute.org/ctrp.v2.1/>). Cells in any growth mode and primary site/subtype were considered for analysis.
- (I) In vitro synergy diagram of combinatorial lapatinib and SC-26196 treatment. ZIP score was used to assess synergy (55).
- (J) (Top) Kaplan-Meier curve showing survival of mice following implantation with GSC3565 following knockdown with two independent, non-overlapping shRNAs targeting ELOVL2 or a non-targeting shRNA (shCONT).  $n=5$  mice per arm. shCONT vs. shELOVL2.308,  $p=0.004$ . shCONT vs. shELOVL2.843,  $p=0.002$ . (Bottom) Hematoxylin and eosin staining of brains following implantation with GSC387 following shCONT or shELOVL2 treatment.
- (K) Kaplan-Meier curve showing survival of mice following implantation with GSC387 following treatment with an shRNA targeting ELOVL2 (shELOVL2.308) or a non-targeting control (shCONT). Mice were treated by oral gavage with vehicle control, low dose lapatinib (20 mg/kg), or high dose lapatinib (40 mg/kg). Vehicle/low dose lapatinib group ( $n=10$ ). High dose lapatinib group ( $n=5$ ).
- (L) Hematoxylin and eosin staining of brains following implantation with GSC387 and treatment as shown in Figure 7K. Scale bar indicates 3mm in upper panels, and 400 $\mu\text{M}$  in the callout.
- (M) Model diagram for the mechanisms underlying ELOVL2 activation and function in glioblastoma

stem cells. In glioblastoma stem cells, a cell-state specific super-enhancer supported by SOX2 drives ELOVL2 expression. ELOVL2 functions to increase long chain polyunsaturated fatty acid synthesis, which supports cell membrane architecture and efficient EGFR signaling.
